# Supplementary material for: Minimal clinically important difference of the 6-Minute walk test and daily step count at 3 months following surgery for lumbar spinal stenosis
Source: Springer Nature journal article supplement (doi:10.1007/s00586-025-09085-4), 2025-07-15

**Minimal Clinically Important Difference of the 6-Minute Walk Test and Daily Step Count at 3 Months following Surgery for Lumbar Spinal Stenosis**

**Supplementary materials**

**Fig. 1** Histograms illustrating the distribution of the 6MWD change scores for responder and non-responders a) anchored to the ODI; b) anchored to satisfaction with walking

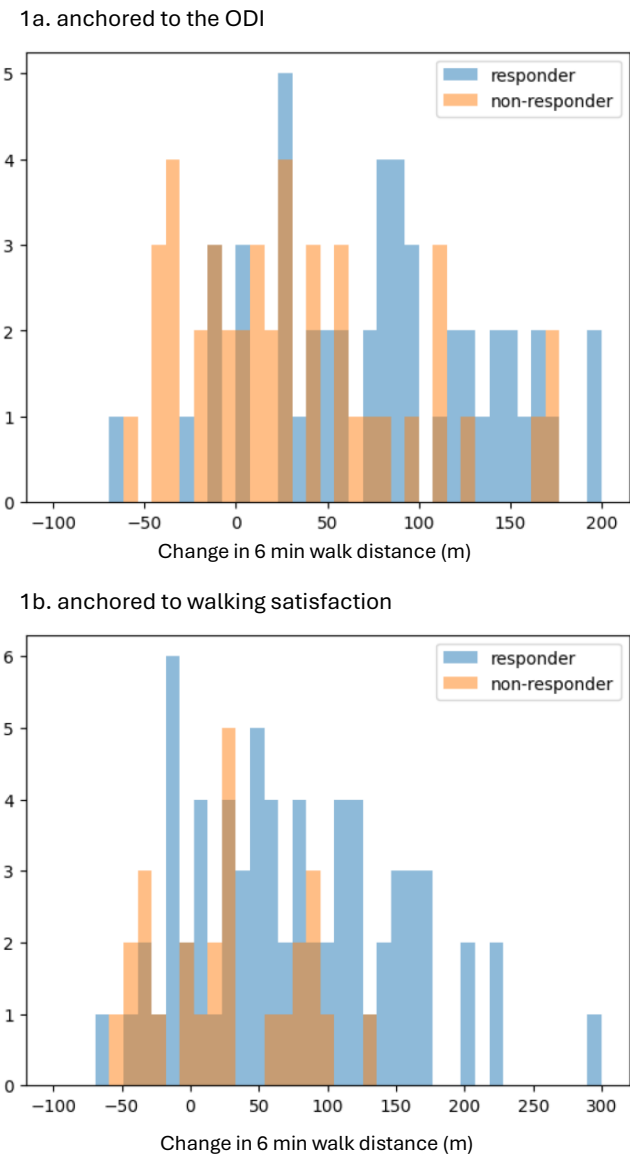

**Fig. 2** Histograms illustrating the distribution of the mean daily step count change values for responder and non-responders a) anchored to the ODI; b) anchored to satisfaction with walking

2a. anchored to the ODI

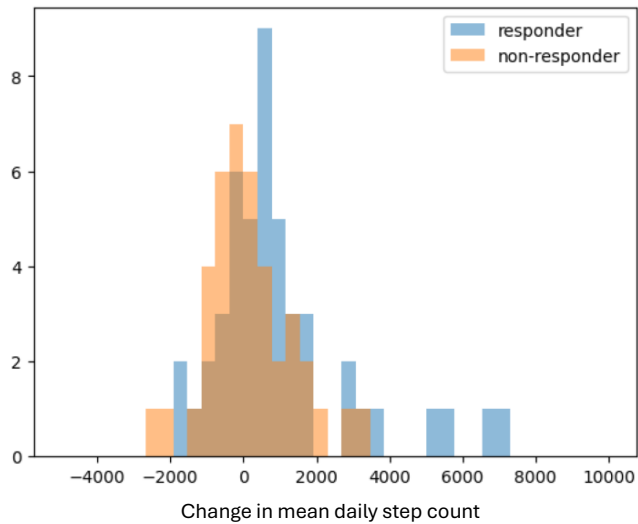

2b. anchored to walking satisfaction

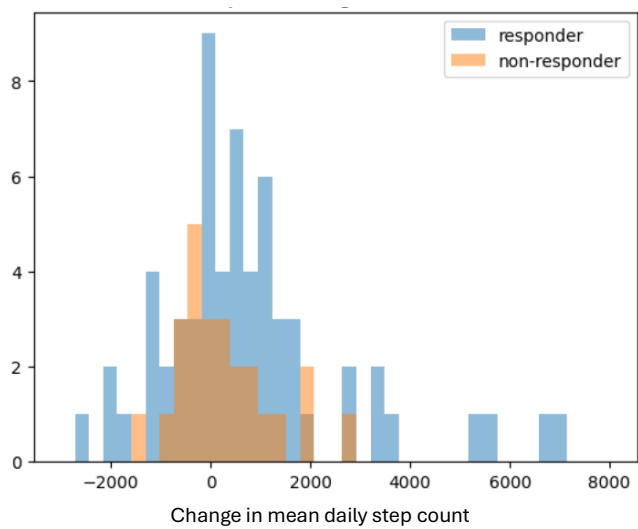

**Fig. 3** illustrating the pre- and post-surgical walking measures for the whole cohort a) 6MWD, b) step count

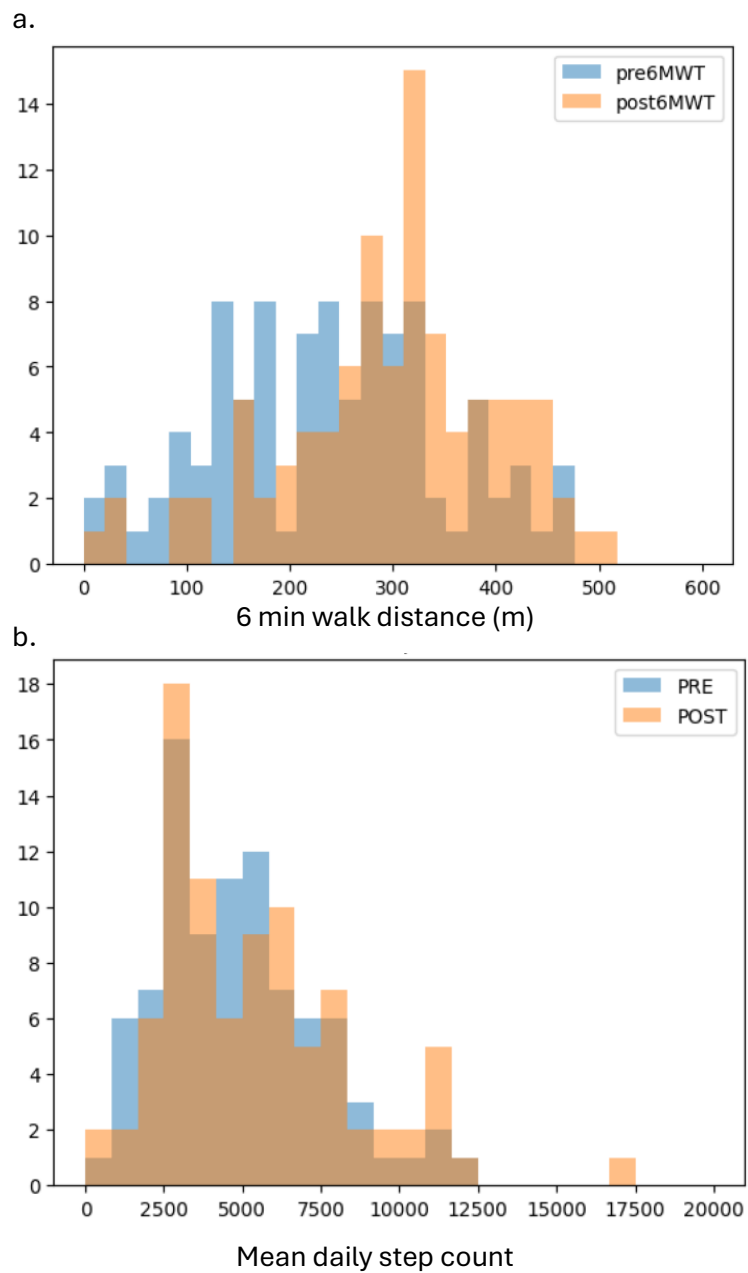

**Fig. 4** scatterplots illustrating change in walking measures compared to change in ODI and post-op walking satisfaction

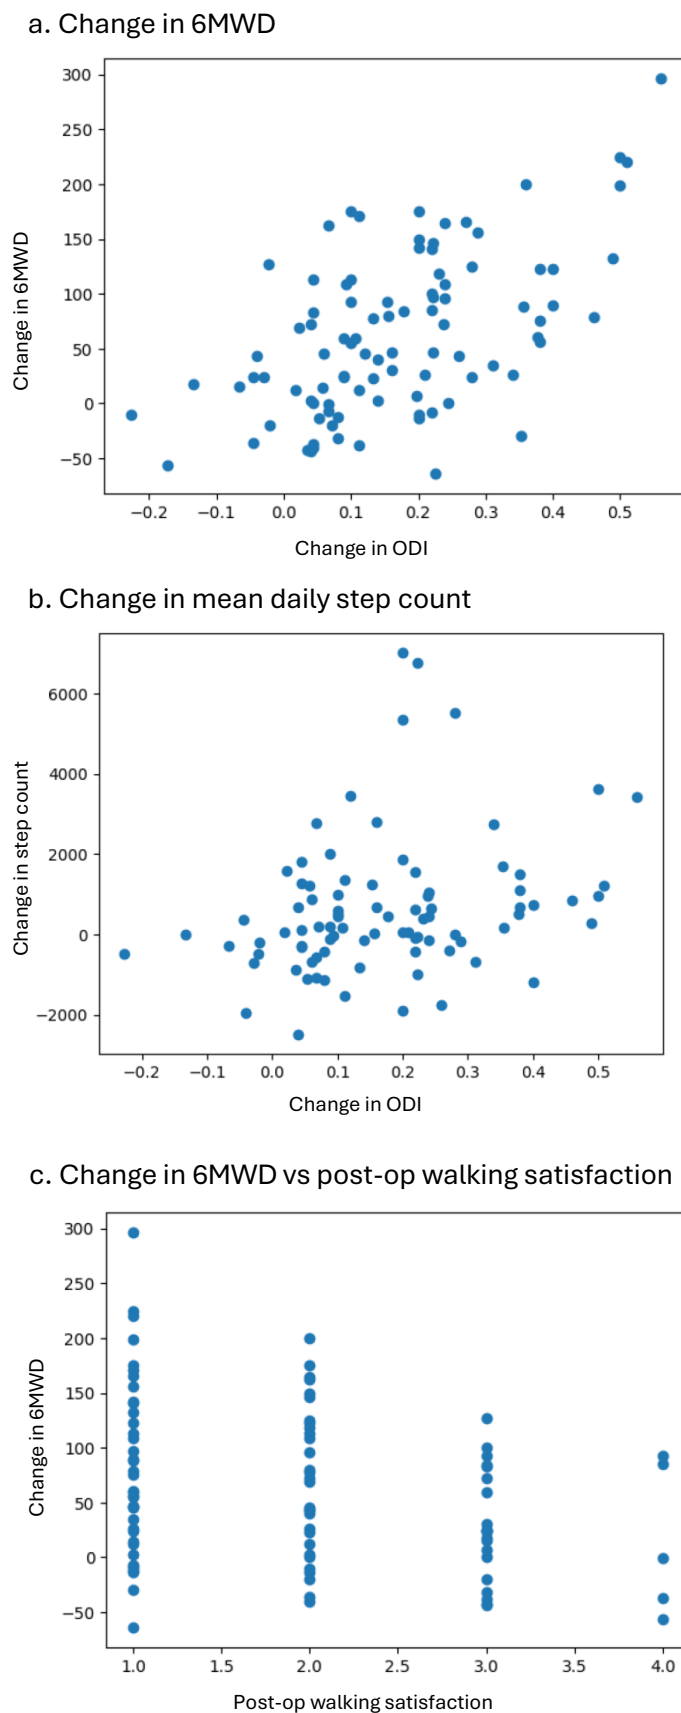

Supplement: MOESM1 [file 586_2025_9085_MOESM1_ESM.pdf]
